# Supplementary material
Source: PubMed Central journal article supplement (PMC4343216)
Supplement: NIHMS660038-supplement-Table_1.pdf [file NIHMS660038-supplement-Table_1.pdf]

| Mutation              | Type     | Exon | Coding Effect | Clinical/Predicted |
|-----------------------|----------|------|---------------|--------------------|
| c.1A>G                | Missense | 3    | p.M1V         | Clinical           |
| c.3G>A                | Missense | 3    | p.M1I         | Clinical           |
| c.60delTinsAA         | indel    | 3    |               | Clinical           |
| c.89G>C               | Missense | 3    | p.G30A        | Clinical           |
| c.91C>T               | Missense | 3    | p.R31C        | Clinical           |
| c.92G>A               | Missense | 3    | p.R31H        | Predicted          |
| c.98_194del           | Deletion | 3    | p.W33fsX4     | Clinical           |
| c.98+2_+6delTAAGG     | Deletion | 3    |               | Clinical           |
|                       |          |      |               |                    |
| c.111G>A              | Missense | 4    | p.W37X        | Clinical           |
| c.149C>A              | Missense | 4    | p.A50D        | Clinical           |
| c.149C>T <sup>b</sup> | Missense | 4    | p.A50V        | Clinical           |
| c.151C>T              | Missense | 4    | p.P51S        | Clinical           |
| c.152C>A              | Missense | 4    | p.P51H        | Clinical           |
| c.165C>G              | Missense | 4    | p.Y55X        | Predicted          |
| c.176G>T              | Missense | 4    | p.M59R        | Clinical           |
| c.185A>T              | Missense | 4    | p.D62V        | Clinical           |
| c.203T>C              | Missense | 4    | p.L68P        | Clinical           |
| c.208G>T <sup>b</sup> | Missense | 4    | p.G70C        | Clinical           |
| c.232G>A              | Missense | 4    | p.G78R        | Predicted          |
| c.265A>T              | Missense | 4    | p.T89S        | Predicted          |
| c.278C>T              | Missense | 4    | p.T93M        | Clinical           |
| c.292C>T              | Missense | 4    | p.Q98X        | Clinical           |
| c.296T>C              | Missense | 4    | p.L99P        | Clinical           |
| c.321G>C              | Missense | 4    | p.Q107H       | Clinical           |
|                       |          |      |               |                    |
| c.326T>C              | Missense | 5    | p.L109P       | Clinical           |
| c.338T>C              | Missense | 5    | p.S113C       | Clinical           |
| c.355delC             | Deletion | 5    | p.H119ifsX8   | Clinical           |
| c.356A>T              | Missense | 5    | p.H119L       | Clinical           |
| c.356_368del13        | Deletion | 5    | p.H119PfsX23  | Clinical           |
| c.374A>G              | Missense | 5    | p.Y125C       | Clinical           |
| c.376G>A              | Missense | 5    | p.V126I       | Predicted          |
| c.385_412+5del        | Deletion | 5    |               | Clinical           |
| c.400G>T              | Missense | 5    | p.V134L       | Clinical           |
|                       |          |      |               |                    |
| c.413G>T              | Missense | 6    | p.G138V       | Clinical           |
| c.433A>C              | Missense | 6    | p.I145L       | Clinical           |
| c.438C>G              | Missense | 6    | p.N146K       | Clinical           |
| c.440G>A              | Missense | 6    | p.G147D       | Clinical           |
| c.443T>G              | Missense | 6    | p.L148R       | Clinical           |
| c.445C>T              | Missense | 6    | p.Q149X       | Clinical           |
| c.452G>A              | Missense | 6    | p.W151X       | Clinical           |
| c.453G>A              | Missense | 6    | p.W151X       | Clinical           |
| c.461C>T              | Missense | 6    | p.T154M       | Clinical           |
| c.461C>G              | Missense | 6    | p.T154R       | Clinical           |
| c.470T>C              | Missense | 6    | p.L157P       | Clinical           |
| c.474G>T              | Missense | 6    | p.W158C       | Clinical           |
| c.502T>A              | Missense | 6    | p.F168I       | Clinical           |
| c.506C>T              | Missense | 6    | p.S169L       | Clinical           |
| c.509C>G              | Missense | 6    | p.P170R       | Predicted          |
| c.521T>C              | Missense | 6    | p.F174S       | Clinical           |
| c.523G>A              | Missense | 6    | p.D175N       | Predicted          |
| c.523G>C              | Missense | 6    | p.D175H       | Clinical           |
| c.529T>C              | Missense | 6    | p.W177R       | Clinical           |
| c.532A>T              | Missense | 6    | p.I178F       | Clinical           |
| c.533T>A              | Missense | 6    | p.I178N       | Clinical           |
| c.536C>T              | Missense | 6    | p.P179L       | Clinical           |
| c.545G>T              | Missense | 6    | p.W182L       | Clinical           |
| c.546G>C              | Missense | 6    | p.W182C       | Clinical           |
| c.548G>A              | Missense | 6    | p.C183Y       | Clinical           |
| c.575C>T              | Missense | 6    | p.S192F       | Clinical           |
| c.577A>C              | Missense | 6    | p.T193P       | Clinical           |
| c.592A>G              | Missense | 6    | p.K198E       | Clinical           |

| <b>Mutation</b>   | <b>Type</b> | <b>Exon</b> | <b>Coding Effect</b> | <b>Clinical/Predicted</b> |
|-------------------|-------------|-------------|----------------------|---------------------------|
| c.628A>T          | Missense    | 7           | p.K210X              | Clinical                  |
| c.651C>A          | Missense    | 7           | p.Y217X              | Clinical                  |
| c.655T>G          | Missense    | 7           | p.Y219D              | Clinical                  |
| c.658A>C          | Missense    | 7           | p.M220L              | Predicted                 |
| c.670G>A          | Missense    | 7           | p.E224K              | Clinical                  |
| c.679C>T          | Missense    | 7           | p.P227S              | Clinical                  |
| c.679C>A          | Missense    | 7           | p.P227T              | Clinical                  |
| c.680dupC         | Duplication | 7           |                      | Clinical                  |
| c.682C>T          | Missense    | 7           | p.R228W              | Clinical                  |
| c.682insC         | Insertion   | 7           | Frameshift           | Clinical                  |
| c.683G>A          | Missense    | 7           | p.R228Q              | Predicted                 |
| c.700G>T          | Missense    | 7           | p.D234Y              | Clinical                  |
| c.704T>C          | Missense    | 7           | p.F235S              | Clinical                  |
| c.719A>G          | Missense    | 7           | p.N240S              | Predicted                 |
| c.720_735del      | Deletion    | 7           | Frameshift           | Clinical                  |
| c.724C>T          | Missense    | 7           | p.R242C              | Clinical                  |
| c.725G>A          | Missense    | 7           | p.R242H              | Clinical                  |
| c.728C>G          | Missense    | 7           | p.P243R              | Clinical                  |
| c.730G>A          | Missense    | 7           | p.G244R              | Clinical                  |
| c.740C>T          | Missense    | 7           | p.A247V              | Clinical                  |
| c.742T>C          | Missense    | 7           | p.W248R              | Clinical                  |
| c.744G>T          | Missense    | 7           | p.W248C              | Clinical                  |
| c.744G>C          | Missense    | 7           | p.W248C              | Clinical                  |
| c.752T>A          | Missense    | 7           | p.I251N              | Clinical                  |
| c.753C>G          | Missense    | 7           | p.I251M              | Clinical                  |
| c.755A>G          | Missense    | 7           | p.N252S              | Clinical                  |
| c.760T>G          | Missense    | 7           | p.S254A              | Clinical                  |
| c.762insT         | Insertion   | 7           | Frameshift           | Clinical                  |
| c.765C>A          | Missense    | 7           | p.F255L              | Clinical                  |
| c.808A>G          | Missense    | 7           | p.M270V              | Clinical                  |
| c.818T>G          | Missense    | 7           | p.V273G              | Clinical                  |
| c.822C>A          | Missense    | 7           | p.N274K              | Clinical                  |
| c.841G>A          | Missense    | 7           | p.V281M              | Clinical                  |
| c.839A>G          | Missense    | 8           | p.Y280C              | Clinical                  |
| c.849_856insCTTCT | Insertion   | 8           |                      | Clinical                  |
| c.852C>A          | Missense    | 8           | p.F284L              | Clinical                  |
| c.854_856delTCT   | Deletion    | 8           |                      | Clinical                  |
| c.861C>A          | Missense    | 8           | p.N287K              | Clinical                  |
| c.862G>A          | Missense    | 8           | p.E288K              | Clinical                  |
| c.866C>T          | Missense    | 8           | p.T289I              | Clinical                  |
| c.883A>G          | Missense    | 8           | p.I295V              | Predicted                 |
| c.890T>C          | Missense    | 8           | p.I297T              | Clinical                  |
| c.896A>G          | Missense    | 8           | p.H299R              | Clinical                  |
| c.902A>G          | Missense    | 8           | p.H301R              | Clinical                  |
| c.906C>G          | Missense    | 8           | p.F302L              | Clinical                  |
| c.907G>A          | Missense    | 8           | p.G303R              | Clinical                  |
| c.920G>A          | Missense    | 8           | p.G307D              | Clinical                  |
| c.925G>A          | Missense    | 8           | p.G309S              | Clinical                  |
| c.928G>A          | Missense    | 8           | p.D310N              | Predicted                 |
| c.931T>G          | Missense    | 8           | p.C311G              | Clinical                  |
| c.932G>A          | Missense    | 8           | p.C311Y              | Clinical                  |
| c.950T>G          | Missense    | 8           | p.L317R              | Clinical                  |
| c.952T>A          | Missense    | 8           | p.Y318N              | Clinical                  |
| c.956C>T          | Missense    | 8           | p.T319M              | Clinical                  |
| c.957G>A          | Missense    | 8           | p.T319A              | Clinical                  |
| c.964-1G>T        | Intronic    | 8           |                      | Clinical                  |
| c.964-1G>C        | Intronic    | 8           | p.G322KfsX136        | Clinical                  |
| c.964G>C          | Missense    | 8           | p.G322R              | Clinical                  |

| Mutation        | Type     | Exon | Coding Effect | Clinical/Predicted |
|-----------------|----------|------|---------------|--------------------|
| c.976G>T        | Missense | 9    | p.V326L       | Clinical           |
| c.986C>T        | Missense | 9    | p.P329L       | Clinical           |
| c.988G>A        | Missense | 9    | p.V330M       | Clinical           |
| c.1022T>C       | Missense | 9    | p.L341P       | Clinical           |
| c.1025T>C       | Missense | 9    | p.L342P       | Predicted          |
| c.1030G>C       | Missense | 9    | p.G344R       | Clinical           |
| c.1031G>A       | Missense | 9    | p.G344D       | Clinical           |
| c.1039G>A       | Missense | 9    | p.G347S       | Clinical           |
| c.1054C>T       | Missense | 9    | p.R352W       | Clinical           |
| c.1055G>A       | Missense | 9    | p.R352Q       | Clinical           |
| c.1055G>T       | Missense | 9    | p.R352L       | Clinical           |
| c.1057Gdel      | Deletion | 9    | Frameshift    | Clinical           |
| c1068_1070del   | Deletion | 9    | p.H356del     | Clinical           |
| c.1058T>C       | Missense | 9    | p.V353A       | Clinical           |
| c.1063A>G       | Missense | 9    | p.N355D       | Clinical           |
| c.1079T>C       | Missense | 9    | p.L360P       | Clinical           |
| c.1083C>G       | Missense | 9    | p.F361L       | Clinical           |
| c.1084C>T       | Missense | 9    | p.R362C       | Predicted          |
| c.1085G>A       | Missense | 9    | p.R362H       | Predicted          |
| c.1085G>A       | Missense | 9    | p.R363H       | Clinical           |
| c.1087C>T       | Missense | 9    | p.R363C       | Clinical           |
| c.1097G>T       | Missense | 9    | p.G366V       | Clinical           |
| c.1088G>A       | Missense | 9    | p.R363H       | Clinical           |
| c.1127_1128delA | Deletion | 9    | p.K376RfsX37  | Clinical           |
| c.1138T>A       | Missense | 9    | p.C380S       | Clinical           |
| c.1138T>C       | Missense | 9    | p.C380R       | Clinical           |
| c.1139G>C       | Missense | 9    | p.C380S       | Clinical           |
| c.1139G>A       | Missense | 9    | p.C380Y       | Clinical           |
| c.1156G>A       | Missense | 9    | p.D386N       | Predicted          |
| c.1187T>A       | Missense | 9    | p.V396E       | Clinical           |
| c.1190C>T       | Missense | 9    | p.S397L       | Clinical           |
| c.1210C>T       | Missense | 9    | p.R404C       | Clinical           |
| c.1210C>A       | Missense | 9    | p.R404S       | Clinical           |
| c.1213C>T       | Missense | 9    | p.H405Y       | Clinical           |
| c.1219A>T       | Missense | 9    | p.N407Y       | Clinical           |
| c.1222T>C       | Missense | 9    | p.Y408H       | Clinical           |
| c.1228G>C       | Missense | 9    | p.G410R       | Clinical           |
| c.1228G>A       | Missense | 9    | p.G410S       | Clinical           |
| c.1231G>A       | Missense | 9    | p.D411N       | Predicted          |
| c.1270G>T       | Missense | 9    | p.G424C       | Predicted          |
| c.1277A>C       | Missense | 9    | p.H426P       | Clinical           |
| c.1289A>G       | Missense | 9    | p.Y432C       | Clinical           |
| c.1290C>G       | Missense | 9    | p.Y430X       | Predicted          |
| c.1295A>G       | Missense | 9    | p.Y432C       | Clinical           |
| c.1327C>T       | Missense | 9    | p.R443C       | Clinical           |
| c.1328G>A       | Missense | 9    | p.R443H       | Clinical           |
| c.1331G>A       | Missense | 9    | p.C444Y       | Clinical           |
| c.1336C>T       | Missense | 9    | p.R446W       | Clinical           |
| c.1337G>A       | Missense | 9    | p.R446Q       | Clinical           |
| c.1342G>C       | Missense | 9    | p.E448Q       | Clinical           |
| c.1342G>A       | Missense | 9    | p.E448K       | Clinical           |
| c.1349G>T       | Missense | 9    | p.R450L       | Clinical           |
| c.1351T>C       | Missense | 9    | p.C451R       | Clinical           |
| c.1366G>A       | Missense | 9    | p.G456S       | Predicted          |
| c.1369C>T       | Missense | 9    | p.R457W       | Predicted          |
| c.1381C>T       | Missense | 9    | p.R461C       | Predicted          |
| c.1384T>C       | Missense | 9    | p.Y462H       | Clinical           |
| c.1396G>A       | Missense | 9    | p.V466M       | Clinical           |
| c.1397T>C       | Missense | 9    | p.V466A       | Clinical           |
| c.1400C>T       | Missense | 9    | p.P467L       | Clinical           |
| c.1405C>T       | Missense | 9    | p.R469C       | Predicted          |
| c.1406G>C       | Missense | 9    | p.R469P       | Clinical           |
| c.1406G>A       | Missense | 9    | p.R469H       | Predicted          |
| c.1409T>A       | Missense | 9    | p.L470Q       | Clinical           |
| c.1423T>C       | Missense | 9    | p.F475S       | Clinical           |
| c.1426T>A       | Missense | 9    | p.X476Q       | Clinical           |
